# Supplementary material for: Exploration driven by a medial preoptic circuit facilitates fear extinction in mice
Source: PubMed Central journal article supplement (PMC9883483; doi:10.1038/s42003-023-04442-9), 2023-01-27
Supplement: 42003_2023_4442_MOESM2_ESM.pdf [file 42003_2023_4442_MOESM2_ESM.pdf]

## Supplementary information

### Exploration driven by a medial preoptic circuit facilitates fear extinction in mice

Anna Shin<sup>1, 2†</sup>, Jia Ryoo<sup>1, 2†</sup>, Kwanhoo Shin<sup>1, 2</sup>, Junesu Lee<sup>1, 2</sup>, Seohui Bae<sup>3</sup>, Dae-Gun Kim<sup>1, 2, 4</sup>, Sae-Geun Park<sup>1</sup>, Daesoo Kim<sup>1, 2, a\*</sup>

<sup>1</sup> Department of Biological Sciences, KAIST, Daejeon 34141, Republic of Korea

<sup>2</sup> Department of Brain and Cognitive Sciences, KAIST, Daejeon 34141, Republic of Korea

<sup>3</sup> KAIST Institute of Artificial Intelligence, KAIST, Daejeon 34141, Republic of Korea

<sup>4</sup> ACTNOVA, Daejeon 34109, Republic of Korea

<sup>†</sup> These authors contributed equally: Anna Shin, Jia Ryoo.

<sup>a</sup> Lead Contact

\*Correspondence: [daesoo@kaist.ac.kr](mailto:daesoo@kaist.ac.kr) (D. Kim).

**a**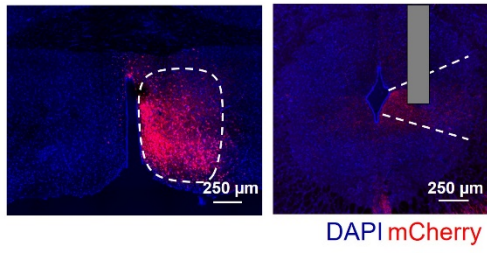**b**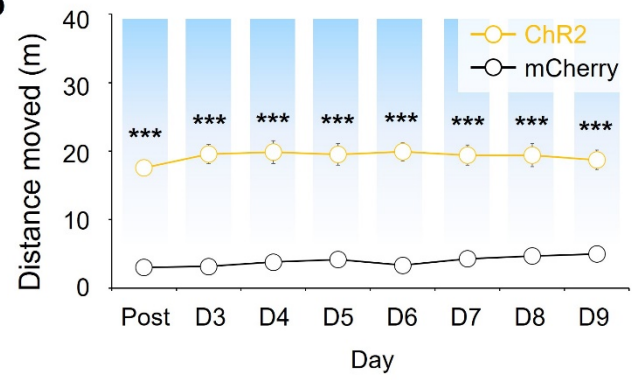**c**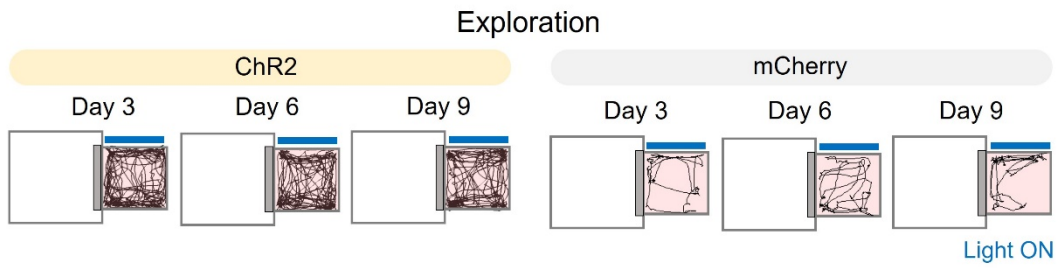

**Supplementary Figure. 1: Photostimulation of the MPA-vPAG circuit increases exploration in the fear-conditioned zone.** (a) A representative image of AAV2.5-CaMKII $\alpha$ -mCherry expression (red) in the MPA and the vPAG. Scale bar: 250  $\mu$ m. (b) Distance moved in the shock zone during the exploration test. The Chr2 group (yellow, n = 8) and the mCherry group (black, n = 8; two-way RM ANOVA test, Holm-Sidak post-hoc analysis). (c) A representative tracking the center points of mice during exploration. \*\*\* $p < 0.001$ . All error bars represent s.e.m. Further information on statistical analyses is given in the supplementary data 1.

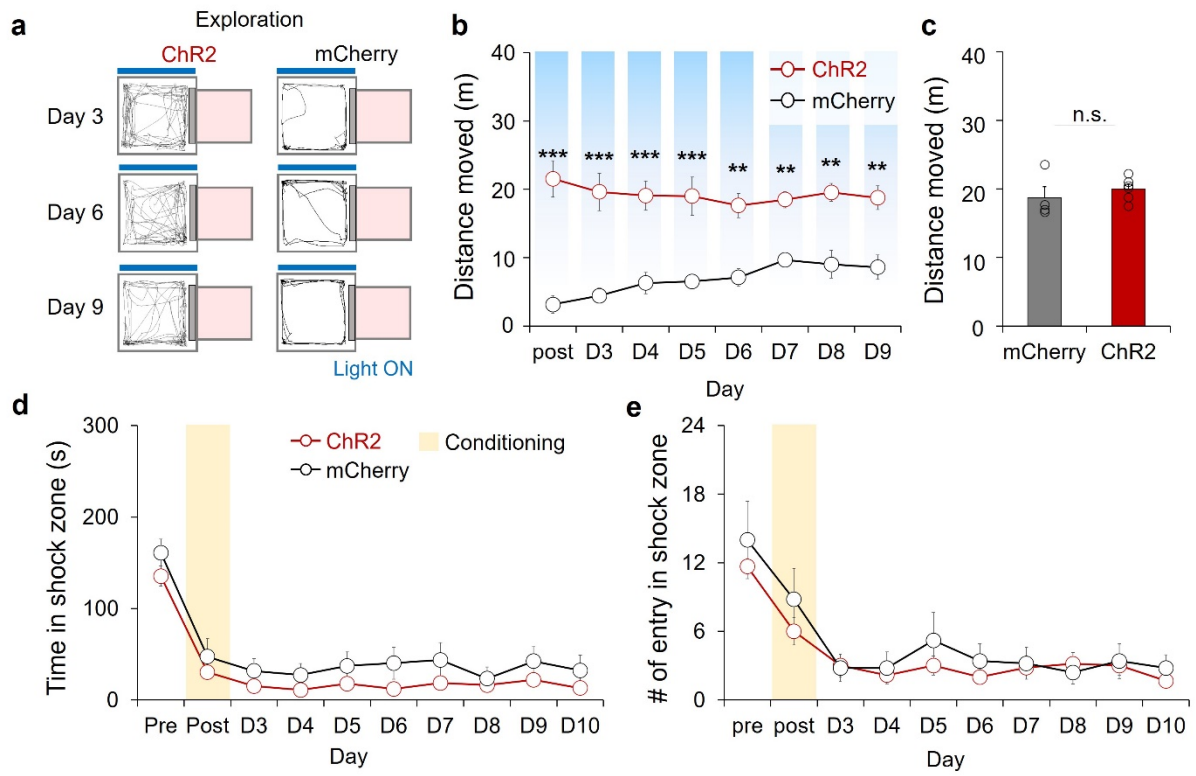

**Supplementary Figure. 2: Increased exploration induced by photostimulation of the MPA-vPAG circuit in the safe zone does not promote fear extinction.** (a) A representative tracking the center points of mice during exploration. (b) Distance moved in the safe zone during the exploration test. The ChR2 group (red,  $n = 6$ ) and the mCherry group (black,  $n = 4$ ; two-way RM ANOVA test, Holm-Sidak post-hoc analysis). (c) Distance moved in both zones during extinction test for the mCherry ( $n = 4$ ) and the ChR2 group ( $n = 6$ ; unpaired  $t$ -test). (d) Time in a safe zone during the exploration test. The ChR2 group (red,  $n = 6$ ) and mCherry group (black,  $n = 4$ ; two-way RM ANOVA test, Holm-Sidak post-hoc analysis). (e) The number of entries into the shock zone during the extinction test. The ChR2 group (red,  $n = 6$ ) and mCherry group (black,  $n = 4$ ; two-way RM ANOVA test, Holm-Sidak post-hoc analysis). n.s., not significant as  $p > 0.05$ . \*\* $p < 0.01$ , \*\*\* $p < 0.001$ . All error bars represent s.e.m. Further information on statistical analyses is given in the supplementary data 1.

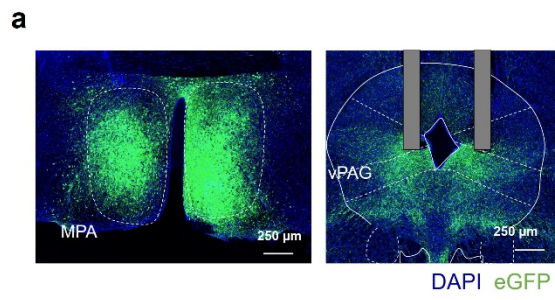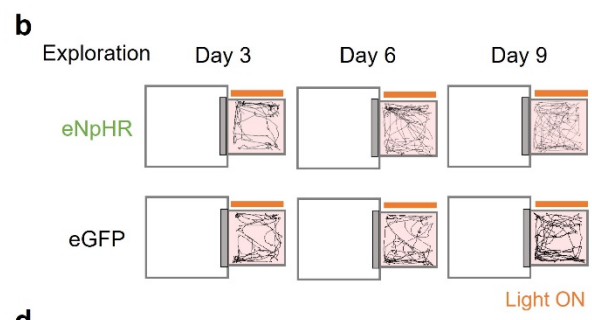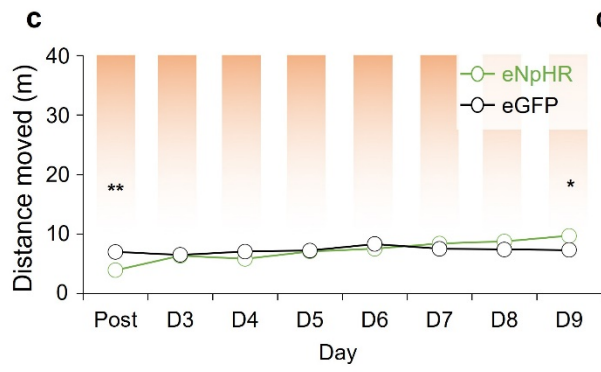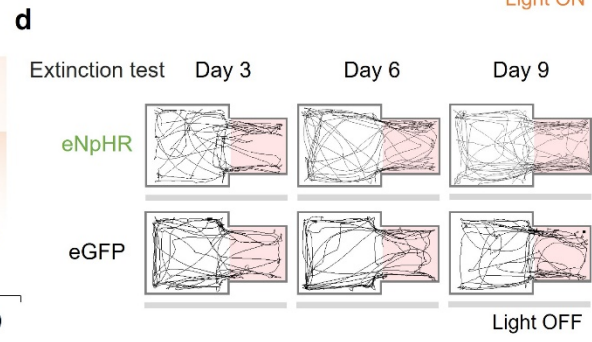

**Supplementary Figure. 3: Photoinhibition of the MPA-vPAG circuit does not affect exploration.** (a) A representative image of AAV2/5-CaMKII $\alpha$ -eGFP expression (green) in the MPA and in the vPAG. Scale bar: 250  $\mu$ m. (b) A representative tracking the center points of mice during exploration in the shock zone. (c) Distance moved in the safe zone during the exploration test. The eNpHR group (green, n = 7) and the eGFP group (black, n = 6; two-way RM ANOVA test, Holm-Sidak post-hoc analysis). (d) A representative tracking the center points of mice during extinction in both zones. \* $p$  < 0.05, \*\* $p$  < 0.01. All error bars represent s.e.m. Further information on statistical analyses is given in the supplementary data 1.

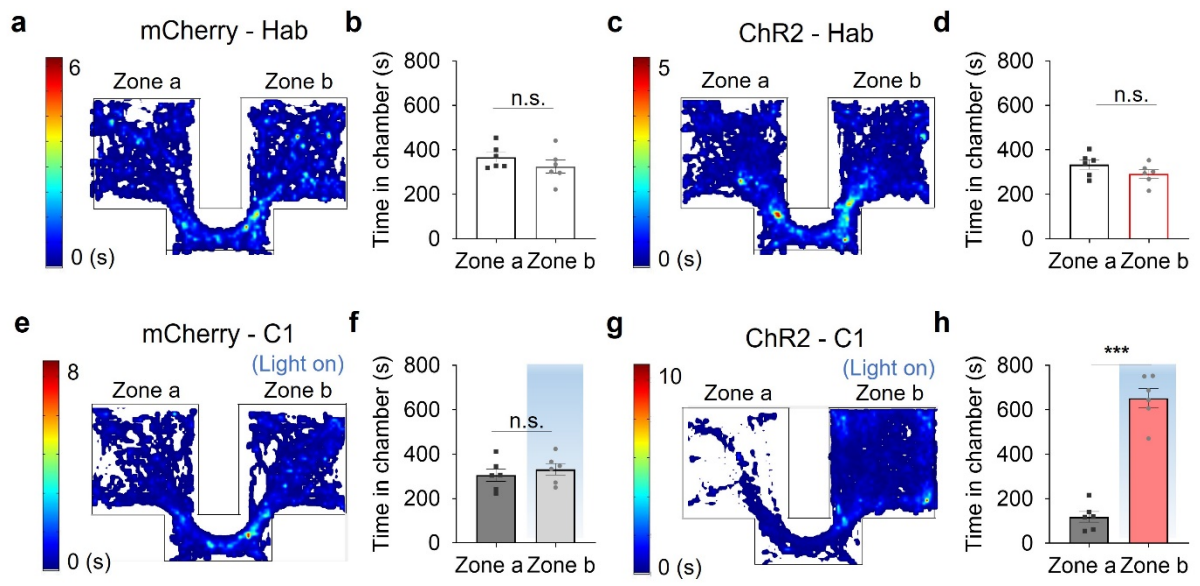



**Supplementary Figure. 4: Place-preference chamber exploration before and during MPA-vPAG circuit activation.** (a) A representative heat map of mouse center point locations during the habituation session. (b) Time in zone a and zone b for the mCherry group during the habituation session (n = 6; paired two-tailed *t*-test). (c) A representative heat map of mouse center point locations during the habituation session. (d) Time in zone a and zone b for the ChR2 group during the habituation session (n = 6; paired two-tailed *t*-test). (e) A representative heat map of mouse center point locations during day-1 of conditioning. (f) Time in zone a and zone b for the mCherry group during day-1 conditioning (n = 6; paired two-tailed *t*-test). (g) A representative heat map of mouse center point locations during day-1 of conditioning. (h) Time in zone a and zone b for the ChR2 group during day-1 conditioning (n = 6; paired two-tailed *t*-test). \*\*\**p* < 0.001; n.s., not significant as *p* > 0.05. All error bars represent s.e.m. Further information on statistical analyses is given in the supplementary data 1.

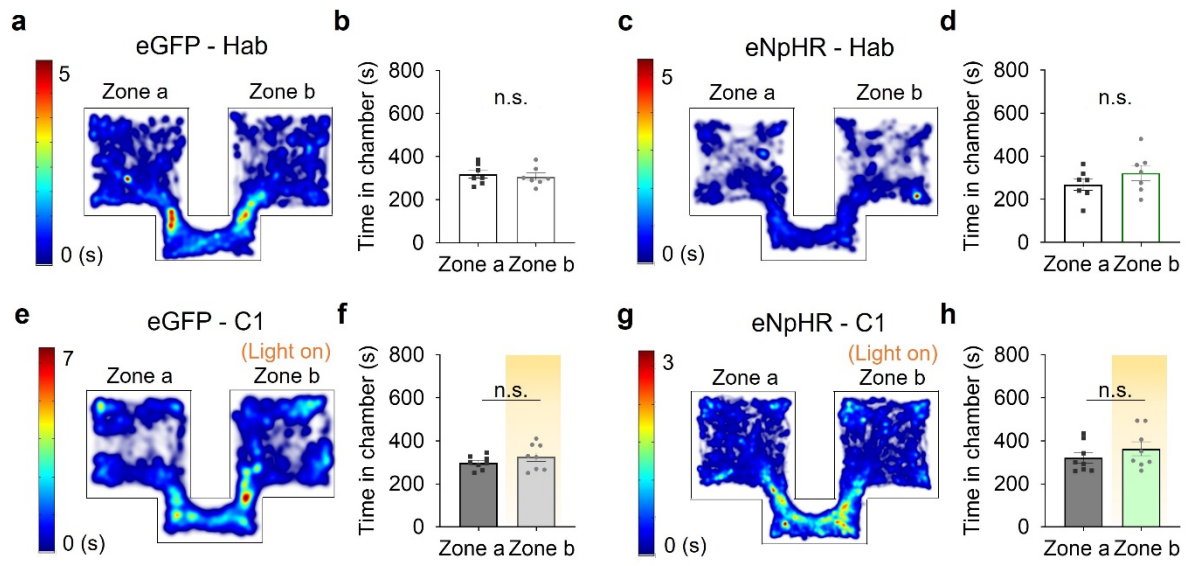

**Supplementary Figure. 5: Place-preference chamber exploration before and during**

**MPA-vPAG circuit inactivation.** (a) A representative heat map of mouse center point locations during the habituation session. (b) Time in zone a and zone b for the eGFP group during the habituation session (n = 7; paired two-tailed *t*-test). (c) A representative heat map of mouse center point locations during the habituation session. (d) Time in zone a and zone b for the eNpHR group during the habituation session (n = 8; paired two-tailed *t*-test). (e) A representative heat map of mouse center point locations during day-1 of conditioning. (f) Time in zone a and zone b for the eGFP group during day-1 of conditioning (n = 7; paired two-tailed *t*-test). (g) A representative heat map of mouse center point locations during day-1 of conditioning. (h) Time in zone a and zone b for the eNpHR group during day-1 of conditioning (n = 8; paired two-tailed *t*-test). n.s., not significant as  $p > 0.05$ . All error bars represent s.e.m. Further information on statistical analyses is given in the supplementary data 1.
