# Supplementary material for: Exploration driven by a medial preoptic circuit facilitates fear extinction in mice
Source: PubMed Central journal article supplement (PMC9883483; doi:10.1038/s42003-023-04442-9), 2023-01-27
Supplement: 42003_2023_4442_MOESM3_ESM.pdf [file 42003_2023_4442_MOESM3_ESM.pdf]

## Description of Additional Supplementary Files

**File Name:** Supplementary Data 1

**Description:** Statistical comparisons and source data underlying figures.
