# Supplementary material for: Exploration driven by a medial preoptic circuit facilitates fear extinction in mice
Source: PubMed Central journal article supplement (PMC9883483; doi:10.1038/s42003-023-04442-9), 2023-01-27
Supplement: 42003_2023_4442_MOESM5_ESM.pdf [file 42003_2023_4442_MOESM5_ESM.pdf]

## Reporting Summary

Nature Portfolio wishes to improve the reproducibility of the work that we publish. This form provides structure for consistency and transparency in reporting. For further information on Nature Portfolio policies, see our [Editorial Policies](#) and the [Editorial Policy Checklist](#).

### Statistics

For all statistical analyses, confirm that the following items are present in the figure legend, table legend, main text, or Methods section.

n/a | Confirmed

- The exact sample size ( $n$ ) for each experimental group/condition, given as a discrete number and unit of measurement
- A statement on whether measurements were taken from distinct samples or whether the same sample was measured repeatedly
- The statistical test(s) used AND whether they are one- or two-sided  
*Only common tests should be described solely by name; describe more complex techniques in the Methods section.*
- A description of all covariates tested
- A description of any assumptions or corrections, such as tests of normality and adjustment for multiple comparisons
- A full description of the statistical parameters including central tendency (e.g. means) or other basic estimates (e.g. regression coefficient) AND variation (e.g. standard deviation) or associated estimates of uncertainty (e.g. confidence intervals)
- For null hypothesis testing, the test statistic (e.g.  $F$ ,  $t$ ,  $r$ ) with confidence intervals, effect sizes, degrees of freedom and  $P$  value noted  
*Give  $P$  values as exact values whenever suitable.*
- For Bayesian analysis, information on the choice of priors and Markov chain Monte Carlo settings
- For hierarchical and complex designs, identification of the appropriate level for tests and full reporting of outcomes
- Estimates of effect sizes (e.g. Cohen's  $d$ , Pearson's  $r$ ), indicating how they were calculated

*Our web collection on [statistics for biologists](#) contains articles on many of the points above.*

### Software and code

Policy information about [availability of computer code](#)

Data collection

We listed all software used in the experiments and for analysis in the Methods section. We used EthoVision XT software to detect and analyze the center point of each mouse to guide the delivery of light stimulation. We used a custom program in Microsoft Visual C++ for the MIDAS.

Data analysis

We mentioned all software used in the experiments and for analysis in the Methods section. We used the code related to the MIDAS system (<https://github.com/Daegun-Kim/MIDAS>) to control the mice's moving direction.

For manuscripts utilizing custom algorithms or software that are central to the research but not yet described in published literature, software must be made available to editors and reviewers. We strongly encourage code deposition in a community repository (e.g. GitHub). See the Nature Portfolio [guidelines for submitting code & software](#) for further information.

### Data

Policy information about [availability of data](#)

All manuscripts must include a [data availability statement](#). This statement should provide the following information, where applicable:

- Accession codes, unique identifiers, or web links for publicly available datasets
- A description of any restrictions on data availability
- For clinical datasets or third party data, please ensure that the statement adheres to our [policy](#)

All data that support the findings of this study are available from the corresponding authors upon request.

## Human research participants

Policy information about [studies involving human research participants and Sex and Gender in Research](#).

|                             |                                                                                      |
|-----------------------------|--------------------------------------------------------------------------------------|
| Reporting on sex and gender | <input type="text" value="This study did not involve human research participants."/> |
| Population characteristics  | <input type="text" value="This study did not involve human research participants."/> |
| Recruitment                 | <input type="text" value="This study did not involve human research participants."/> |
| Ethics oversight            | <input type="text" value="This study did not involve human research participants."/> |

Note that full information on the approval of the study protocol must also be provided in the manuscript.

## Field-specific reporting

Please select the one below that is the best fit for your research. If you are not sure, read the appropriate sections before making your selection.

Life sciences       Behavioural & social sciences       Ecological, evolutionary & environmental sciences

For a reference copy of the document with all sections, see [nature.com/documents/nr-reporting-summary-flat.pdf](https://nature.com/documents/nr-reporting-summary-flat.pdf)

## Life sciences study design

All studies must disclose on these points even when the disclosure is negative.

|                 |                                                                                                                                                                                                                              |
|-----------------|------------------------------------------------------------------------------------------------------------------------------------------------------------------------------------------------------------------------------|
| Sample size     | <input type="text" value="No statistical analysis was used to predetermine the sample size. Sample sizes were selected based on previous experience from related research and literature."/>                                 |
| Data exclusions | <input type="text" value="No data were excluded."/>                                                                                                                                                                          |
| Replication     | <input type="text" value="Experimental findings were reliably reproduced among all subjects in all experiments comprised of multiple cohorts. Optogenetic experiments were conducted with more than 3 cohorts of animals."/> |
| Randomization   | <input type="text" value="Animals were randomly assigned to control and treatment groups. The light-paired zone was randomized for a counterbalance for the animal with a place preference test."/>                          |
| Blinding        | <input type="text" value="Investigators were not blinded to group allocation or data collection, but the analyses of behavioral data were performed blind with computer software."/>                                         |

## Reporting for specific materials, systems and methods

We require information from authors about some types of materials, experimental systems and methods used in many studies. Here, indicate whether each material, system or method listed is relevant to your study. If you are not sure if a list item applies to your research, read the appropriate section before selecting a response.

### Materials & experimental systems

| n/a                                 | Involvement                                                     |
|-------------------------------------|-----------------------------------------------------------------|
| <input checked="" type="checkbox"/> | <input type="checkbox"/> Antibodies                             |
| <input checked="" type="checkbox"/> | <input type="checkbox"/> Eukaryotic cell lines                  |
| <input checked="" type="checkbox"/> | <input type="checkbox"/> Palaeontology and archaeology          |
| <input type="checkbox"/>            | <input checked="" type="checkbox"/> Animals and other organisms |
| <input checked="" type="checkbox"/> | <input type="checkbox"/> Clinical data                          |
| <input checked="" type="checkbox"/> | <input type="checkbox"/> Dual use research of concern           |

### Methods

| n/a                                 | Involvement                                     |
|-------------------------------------|-------------------------------------------------|
| <input checked="" type="checkbox"/> | <input type="checkbox"/> ChIP-seq               |
| <input checked="" type="checkbox"/> | <input type="checkbox"/> Flow cytometry         |
| <input checked="" type="checkbox"/> | <input type="checkbox"/> MRI-based neuroimaging |

## Animals and other research organisms

Policy information about [studies involving animals](#); [ARRIVE guidelines](#) recommended for reporting animal research, and [Sex and Gender in Research](#)

|                         |                                                                                                                                                               |
|-------------------------|---------------------------------------------------------------------------------------------------------------------------------------------------------------|
| Laboratory animals      | The male C57BL/6J mice had free access to food and water and were kept on a 12-h light-dark cycle. Experiments were performed on adult mice (9-11 weeks old). |
| Wild animals            | The study did not involve wild animals.                                                                                                                       |
| Reporting on sex        | Only male mice were used.                                                                                                                                     |
| Field-collected samples | The study did not involve data collected from the field.                                                                                                      |
| Ethics oversight        | All care and handling of mice were performed according to the directives of the Animal Care and Use Committee of KAIST.                                       |

Note that full information on the approval of the study protocol must also be provided in the manuscript.
